1 **Genotype-dependent responses to long-term water stress in**  
2 ***Chenopodium quinoa* Willd.**

3 **Maestro-Gaitán I.<sup>1</sup>, Granado-Rodríguez, S.<sup>1</sup>, Orús M. .<sup>1</sup>, Matías, J.<sup>2</sup>, Cruz, V<sup>2</sup>, Bolaños L.<sup>1</sup>,**  
4 **Reguera, M.<sup>1\*</sup>**

5 <sup>1</sup> Departamento de Biología, Universidad Autónoma de Madrid, c/Darwin 2, Campus de  
6 Cantoblanco, 28049, Madrid, Spain. Isacc Maestro Gaitán: [Isaac.maestro@uam.es](mailto:Isaac.maestro@uam.es); Sara Granado  
7 Rodríguez; [sara.granado@uam.es](mailto:sara.granado@uam.es); María Isabel Orús Orús: [mabel.orus@uam.es](mailto:mabel.orus@uam.es); Luis Bolaños  
8 Rosa: [luis.bolarios@uam.es](mailto:luis.bolarios@uam.es); María Reguera Blázquez: [maría.reguera@uam.es](mailto:maría.reguera@uam.es);

9 <sup>2</sup> Agrarian Research Institute “La Orden-Valdesequera” of Extremadura (CICYTEX). 06187,  
10 Badajoz, Spain. Javier Matías Prieto: [javier.matias@juntaex.es](mailto:javier.matias@juntaex.es); Verónica Cruz Sobrado:  
11 [veronica.cruz@juntaex.es](mailto:veronica.cruz@juntaex.es);

12 \* **Corresponding author:** Maria Reguera [maria.reguera@uam.es](mailto:maria.reguera@uam.es)

13 **Submission date:** April 12<sup>th</sup>, 2022

14 **Number of Figures:** 8

15 **Supplementary Tables:** 4

16 **Supplementary Figures:** 5

17

18 **Keywords:** Drought; Photosynthesis; Phenology; Plant physiological responses; Quinoa;  
19 Seed yield;

20 **Abbreviations:** ETR: electron transportation rate; DW: dry weight; FW: fresh weight;  
21 GSW: stomatal conductance; HI: harvest index; Fv/Fm: maximum quantum yield of  
22 photosystem II; ΦPSII: efficiency of photosystem II, NPQ: non-photochemical  
23 quenching; SWC: soil water content; WD: water-deficit; WW: well-watered.

24

25

26

27

28

29

30 **Highlight**

31 Quinoa physiological, phenological, and morphological distinct responses to long-term  
32 water stress depending on the genotype.

33 **Abstract**

34 Within the current climate context, freshwater resources have become scarce.  
35 Agriculture, especially in rain-fed conditions, should deal with the need for increasing  
36 yields to contribute to food security under limiting water availability. Exploring  
37 underutilized crops such as *Chenopodium quinoa* (quinoa) has become a unique  
38 opportunity as some of these crops possess the ability to tolerate several abiotic stresses,  
39 including drought. In line with this, this work aimed at evaluating the genotype-dependent  
40 response to drought by comparing the performance of different European-adapted  
41 cultivars (F14, F15, F16, and Titicaca). The results show that the cultivars here evaluated  
42 presented different mechanisms to cope with long-term water stress, including changes  
43 in phenology, morphology, or physiology. Among them, the cultivar F16 might be the  
44 most promising genotype to grow under water-limiting conditions as it was able to  
45 increase Water Use Efficiency (WUE), reducing the stomatal conductance and keeping  
46 CO<sub>2</sub> assimilation rates similar to well-watered conditions, maintaining seed yield and  
47 increasing harvest index (HI) under water deficit conditions. Furthermore, based on these  
48 results, we propose a model in which differences between a tolerant and a sensitive  
49 genotype are presented. Altogether, we believe that this work will significantly contribute  
50 to broadening our understanding regarding how quinoa responds to long-term water stress  
51 highlighting genotype-related differences that will allow the selection of the best adapted  
52 genotypes for water-limiting environments.

53

## 54        **1. Introduction**

55        Current prospects estimate that 60% of the global population may suffer water scarcity  
56        by 2025, with drought reducing severely agriculture economic outputs (Naumann et al.,  
57        2021; Qadir et al., 2007). In line with this, in arid and semiarid areas, including those  
58        found in the Mediterranean region, water deficit is among the major constraints for  
59        agricultural production (Jacobsen et al., 2013; Trambly et al., 2020). Hence, water  
60        limitation is threatening agriculture, with growing irrigation needs due to an increased  
61        demand for food production (Araus, 2004). Researching efficient ways to use water  
62        resources is crucial when aiming at improving water management to ensure agricultural  
63        production, securing food worldwide under changing climatic conditions (Jacobsen et al.,  
64        2013). Thus, a more efficient use of water can be achieved through the improvement of  
65        water management together with the selection of optimal crops and/or varieties for rain-  
66        fed conditions (i.e. breeding crop varieties more water-use efficient) (Araus, 2004).

67        *Chenopodium quinoa* Willd., commonly known as quinoa, has been widely studied in  
68        recent years due to its high nutritional value (Graf et al., 2015; Vega-Gálvez et al., 2010).  
69        It constitutes a facultative halophyte with a large genetic diversity reflecting its potential  
70        adaptability to a wide range of environments (Zou et al., 2017). In fact, it has been  
71        proposed that quinoa can be an alternative and promising crop for marginal environments  
72        as is able to tolerate well different abiotic stresses (including drought) (Choukr-Allah et  
73        al., 2016; Hinojosa et al., 2018; Jacobsen, 2003).

74        Singh (Singh, 2009), defined drought tolerance as the causative mechanisms of a  
75        minimum yield loss in drought conditions relative to the maximum yield obtained in an  
76        optimal environment. Thus, plants able to grow and maintain yields under limited water  
77        supplies are considered drought-tolerant (Moser, 2004). In line with this, quinoa has been  
78        defined as a drought-tolerant crop able to grow within a precipitation range that may vary

79 between 300 and 1000 mm (with an optimal found between 500-800 mm), being (water  
80 availability) critical for the crop establishment and during seed filling stage (Gómez-  
81 Pando & Aguilar-Castellanos, 2016; Jacobsen et al., 2003). The impact of drought has  
82 been previously explored on quinoa (reviewed by Hinojosa et al. (Hinojosa et al., 2018)).  
83 In some of these aforementioned studies, the impact of severe water stress was applied at  
84 certain developmental stages, revealing that the flowering and seed filling stages are the  
85 most sensitive phases to drought and critical points determining yields in this crop  
86 (Bertero & Ruiz, 2008; Gámez et al., 2019; Hinojosa et al., 2019). Accordingly, it was  
87 shown that drought stress can accelerate quinoa flowering shortening the vegetative  
88 phase, as a mechanism to minimize dehydration, without necessarily implying yield  
89 penalties, as observed in other plant species like wheat (Jacobsen et al., 2003; Shavrukov  
90 et al., 2017). Nonetheless, differential physiological responses to drought have been  
91 observed among different quinoa genotypes in terms of yield, chlorophyll fluorescence,  
92 or CO<sub>2</sub> assimilation rates supporting a genotypic role controlling water stress response in  
93 this plant species (Hinojosa et al., 2018).

94 Still, there are very few studies performed in quinoa analysing the physiological response  
95 to long-term water stress throughout development to assess distinct mechanisms that may  
96 be genotype-dependent. Thus, this work aimed at evaluating the physiological impact of  
97 long-term water deficit on the emergent crop quinoa throughout development, with  
98 drought stress applied from branching until seed harvesting. The experimental approach  
99 attempted to simulate western Mediterranean rain-fed conditions considering the optimal  
100 sowing date for quinoa in this particular area, which takes place in February-March, and  
101 in which the dry season (from April till the end of the life cycle) coincides with the  
102 transition to reproductive stage in this crop (Matías et al., 2021). Also, the genotypic

103 variability linked to differential physiological responses was analysed by comparing the  
104 performance of different European-adapted cultivars.

## 105 **2. Materials and Methods**

### 106 *2.1 Plant material, experimental design, and growth conditions*

107 Four *Chenopodium quinoa* (quinoa) cultivars (F14, F15, F16, and Titicaca) were grown  
108 in a greenhouse located at the Centre for Plant Biotechnology and Genomics (CBGP) in  
109 Madrid, Spain (40°24'20.2"N 3°49'56.8"W). F14, F15, and F16 seeds were provided by  
110 the company Algosur S.L. (Lebrija, Spain) and the Titicaca seeds were supplied by the  
111 company Quinoa Quality (Copenhagen, Denmark).

112 The plants were grown under natural light conditions supplemented with high-pressure  
113 sodium (HPS) lamps from November 2020 till June 2021 (with a photoperiod varying  
114 from 9 h to 15 h light) with oscillating temperatures ranging between 15°C and 20°C.  
115 Quinoa plants were planted in 8 L pots (using a mixture peat:vermiculite (3:1) at a bulk  
116 density of 0.153 g/cm<sup>3</sup> to ensure uniformity, supplemented with a controlled release  
117 fertilizer Nutricote<sup>®</sup> following manufacture recommendations) and were subjected to two  
118 different water treatments: water control conditions (Well-Watered, WW), in which soil  
119 water content (SWC) was kept at 70%, and water stress conditions (Water-Deficit, WD),  
120 in which SWC was kept at 35% (Supplementary Fig. 1A) from 7<sup>th</sup> week after sowing,  
121 when plants started branching.

### 122 *2.2 Morphological parameters*

123 Plant height was measured as the stem height, from the base part of the plant to the apical  
124 shoot. Leaf area was determined by taking images of the first pair of fully expanded leaves  
125 and then the images were processed using the open-source software ImageJ  
126 (<http://rsbweb.nih.gov/ij/>).

### 127 2.3 Plant biomass and seed yield

128 Plant biomass was analysed at two developmental stages, at the vegetative stage and  
129 harvesting, and was determined by cutting the plants and weighing them to measure, first,  
130 the fresh weight (FW), and then, after drying the plant material in an oven at 65°C for 72  
131 h, to measure the dry weight (DW). Total seed yield was determined by weighting the  
132 seeds per plant at physiological maturity. Seed yield of primary panicles was separated  
133 manually to evaluate seed yield distribution along the plant. Harvest index (HI) was  
134 calculated as the ratio between the seed yield (S) and the total biomass (S + plant).

### 135 2.4 Photosynthetic parameters

136 Photosynthetic parameters were measured weekly in fully expanded leaves in the upper  
137 part of the plant. The *photosynthetic activity*, as CO<sub>2</sub> assimilation rate, was determined  
138 by using a Portable Photosynthesis System (IRGA LC Pro+ ADC Bioscientific LTD,  
139 Hoddesdon, UK) at two developmental stages (pre-anthesis and at seed filling stage, that  
140 corresponded to the 13<sup>th</sup> and 17<sup>th</sup> week, respectively). The *chlorophyll index* was  
141 measured by using the Chlorophyll Content Meter CCM200 plus (Opti-sciences, Hudson,  
142 US). *Chlorophyll fluorescence* and *stomatal conductance* (GSW) parameters were  
143 determined by using the LI-COR Li-600 porometer and fluorometer (Lincoln, Nebraska  
144 USA). Chlorophyll fluorescence parameters were taken in light- and dark-adapted leaves  
145 (this last, after 20 minutes of dark adaptation period). The minimum chlorophyll *a*  
146 fluorescence in the dark (F<sub>o</sub>), the maximum chlorophyll *a* fluorescence in the dark (F<sub>m</sub>),  
147 the maximum chlorophyll *a* fluorescence in the light (F<sub>m</sub>'), and the steady-state  
148 photosynthesis in the light (F<sub>s</sub>) were measured and used to calculate the maximum  
149 quantum yield of photosystem II (PSII) (F<sub>v</sub>/F<sub>m</sub>), the efficiency of the PSII ( $\Phi_{PSII}$ ), the  
150 electron transport rate (ETR), and non-photochemical quenching (NPQ). The conditions

151 set were: a high flow rate of  $150 \mu\text{m}\cdot\text{s}^{-1}$ , a match time-frequency of 10 m, a flash intensity  
152 for light-adapted leaves at  $10000 \mu\text{mol}\cdot\text{m}^{-2}\cdot\text{s}^{-1}$  and  $6000 \mu\text{mol}\cdot\text{m}^{-2}\cdot\text{s}^{-1}$  for dark-adapted  
153 leaves, a flash-length of 800 ms, leaf absorbance of 0.8, a fraction absorbance of PSII of  
154 0.5, and an integrated modulation intensity of  $6.67 \mu\text{mol}\cdot\text{m}^{-2}\cdot\text{s}^{-1}$  for light-adapted leaves  
155 and  $0.0667 \mu\text{mol}\cdot\text{m}^{-2}\cdot\text{s}^{-1}$  for dark-adapted leaves. The integrated modulation intensity  
156 was calculated as  $2 \cdot 667 \cdot 10000 \cdot \text{actinic modulation rate}$  (500 Hz for light-adapted  
157 leaves and 5 Hz for dark-adapted leaves).

## 158 *2.5 Statistical analysis*

159 A Three-Way ANOVA followed by a Tukey post-hoc was performed to analyse the  
160 influence of the developmental stage, water treatment, and cultivar and their interaction  
161 in the different parameters measured in this study. For variables where normality and  
162 equal variances could be assumed following a Kolmogorov-Smirnov and a Levene's test,  
163 respectively, a One-way ANOVA test was performed, followed by a Tukey post-hoc test,  
164 to perform multiple comparisons at a probability level of 5% ( $p < 0.05$ ). A Kruskal-Wallis  
165 test by ranks was performed when data did not present a normal distribution (tested by  
166 performing a Kolmogorov-Smirnov test ( $p > 0.05$ )). A Welch's ANOVA test followed by  
167 a Games-Howell post-hoc test ( $p > 0.05$ ) was performed when variances were not equal  
168 (tested by performing a Levene's test,  $p > 0.05$ ). When data were compared by pairs,  
169 Student's T-test or U-Mann Whitney's test were carried out for normal or not normal data  
170 distribution, respectively. All the statistical analysis were performed using the statistical  
171 software IBM SPSS version 26.0 (IBM SPSS Inc., New York, NY, USA).

172

## 173 **3. Results**

### 174 *3.1 Plant morphological responses*

175 Differences in development appeared among cultivars and water treatments (Fig. 1). The  
176 first plants reaching the flowering stage were the Titicaca plants, independently of the  
177 water treatment applied. Under WD, Titicaca plants accelerated flowering compared to  
178 WW plants, shortening its reproductive stage (from flowering till physiological maturity)  
179 in 11 days, on average. Other differences were observed among cultivars. For instance,  
180 although WD Titicaca plants were the ones that first reached the seed filling stage, WW  
181 F14 plants were harvested three weeks earlier than the rest of WD cultivars and more than  
182 four weeks earlier than the rest of WW cultivars (Fig. 1). Also, WD F15 plants delayed  
183 their flowering 4 days, on average, compared to WW F15.

184 The cultivar that presented the longest life cycle was F16, which lasted for 33 weeks in  
185 the case of WW plants, eight more weeks than the same cultivar growing under WD  
186 conditions. Also, F15 and Titicaca plants showed longer cycles under WW conditions  
187 contrary to F14 plants' behaviour, presenting a longer life cycle under WD conditions.

188 Regarding plant height, WW plants were generally higher than those growing under WD  
189 (Fig. 2). Differences were more remarkable from week 14<sup>th</sup>, where plants of each  
190 condition could be grouped in two separated groups, WW and WD plants (Fig. 2A).  
191 Among genotypes, F16 plants were the tallest under both conditions (Fig 2A). These  
192 differences were maintained at harvesting (Fig. 2B), when panicle length was also  
193 measured. All cultivars presented larger panicle lengths under WW conditions compared  
194 to WD except for Titicaca, which did not show differences between treatments in this  
195 parameter (Fig. 2 C). Likewise, the cultivars that showed the largest panicles were F16  
196 and Titicaca.

197 Plant biomass was first measured at the vegetative stage (at the 9<sup>th</sup> week) (Fig. 3). Among  
198 the cultivars analysed grown under WW conditions, F16 and F15 plants showed larger  
199 FW than F14 or Titicaca plants, being WW F16 the one presenting the highest FW.



200 Differences in FW appeared between water treatments in the cultivars F15 and F16, where  
201 WW plants showed higher weights (Fig. 3). On the contrary, no differences in DW  
202 appeared under WD in these cultivars, but Titicaca plants showed larger DW under WD  
203 conditions reflecting a positive impact of a water reduction in growth (Fig 3).

204 The ramification and number of leaves were also determined (Supplementary Table 1).  
205 F15 and Titicaca were the cultivars showing more ramifications and leaves compared to  
206 F16 or F14. It should be noted that F16 showed larger defoliation rates throughout  
207 development, under both, WW and WD, conditions. Furthermore, at the vegetative stage,  
208 all cultivars presented similar morphological characteristics, but at flowering, larger  
209 differences in the plant structure appeared. Among them, F16 plants presented a  
210 horizontal positioning of their leaves and started defoliation of bottom leaves, reaching  
211 complete defoliation of the lower half of the plant at latter stages, from seed filling stage  
212 onwards. The other cultivars presented a higher ramification number and more leaves on  
213 the lower parts of the plant, and the leaves located around the inflorescence were less  
214 turgid, showing a vertical disposition contrary to what was observed in F16 plants (Fig  
215 4). To complement this analysis, leaf area was measured at different developmental stages  
216 (Supplementary Fig. 2). At the 2 true leaves stage, in which no water stress was yet  
217 applied, the cultivar which generated bigger fully expanded leaves was Titicaca, followed  
218 by F15, F16, and F14. At the ramification stage (7<sup>th</sup> week), no differences were found  
219 between cultivars nor water treatment. Nevertheless, when the flowering bud was  
220 emerging, differences appeared among cultivars and water treatments, being the cultivars  
221 F15 and F16 the ones showing bigger fully expanded leaves under WW conditions  
222 (Supplementary Fig. 2) and the only cultivars that reduced their leaf area under WD  
223 conditions.

### 224 *3.2 Plant physiological responses*

225 The chlorophyll index was measured weekly on upper fully expanded leaves (Fig. 5A)  
226 and also was taken at different parts in the plant (upper, middle, and lower part)  
227 (Supplementary Fig. 3). The chlorophyll index in the upper fully expanded leaves of the  
228 plants was calculated and a 3-Way ANOVA was performed to evaluate the influence of  
229 the three factors. The developmental stage ( $p<0.001$ ), the cultivar ( $p<0.001$ ), the water  
230 treatment ( $p=0.001$ ), the interaction between the developmental stage and the cultivar  
231 ( $p=0.003$ ), and the interaction between the cultivar and the water treatment ( $p=0.006$ ),  
232 influenced this parameter. Furthermore, significantly higher levels of chlorophyll were  
233 found in WD plants compared to WW plants. Also, an increment of chlorophyll was  
234 observed till the 16<sup>th</sup> week, followed by a progressive decrease until the end of the  
235 experiment (seed mature stage). When focusing on the differences between cultivars, it  
236 was observed that F16 was able to maintain the chlorophyll levels constant during  
237 development, independently of the water treatment, and showed a higher chlorophyll  
238 index than the rest of cultivars independently of the water treatment. When comparing  
239 water treatments within each cultivar, it was noted that F15 showed higher chlorophyll  
240 levels under WD than in WW, differences that were kept up to the 22<sup>nd</sup> week. At the seed  
241 filling stage, Titicaca WW plants showed higher levels of chlorophyll compared with WD  
242 plants (Fig. 5A).

243 When comparing the chlorophyll index among the different parts of the plant, it was  
244 observed that the only cultivar that showed a gradient in the chlorophyll index, from the  
245 upper part of the plant to the lower part, was F16, while the rest of cultivars  
246 (independently of the water treatment), showed similar chlorophyll levels in the upper  
247 and middle leaves, being these higher than the lower leaves' chlorophyll index  
248 (Supplementary Fig. 3).

249 Stomatal conductance (GSW) was measured throughout the experiment (Fig. 5B). All the  
250 factors analysed, including the cultivar ( $p<0.001$ ), treatment ( $p<0.001$ ), and  
251 developmental stage ( $p<0.001$ ), and their interactions ( $p<0.001$ ), influenced this  
252 parameter. A decrease in GSW was shown as the crop was growing, being this parameter  
253 higher in WW plants than WD plants, and, in general terms, among cultivars, being higher  
254 in the F15 cultivar. On the other hand, GSW was decreasing gradually over time for all  
255 cultivars, independently of the water treatment. Nonetheless, differences were observed  
256 among cultivars. For instance, Titicaca GSW behaved similarly between water treatments  
257 and maintained GSW levels constant until their decrease on the 24<sup>th</sup> week (at the  
258 physiological maturity stage). Also, F16 GSW showed similar values from flowering  
259 (14<sup>th</sup> week) till the end of the experiment when differences appeared between WW and  
260 WD conditions.

261 CO<sub>2</sub> assimilation rates were analysed at two critical development stages (at vegetative  
262 and seed filling stages) (Fig. 5C and 5D). By performing a 3-Way ANOVA analysis, the  
263 significant factors influencing this parameter were the water treatment ( $p <0.001$ ), the  
264 cultivar ( $p <0.001$ ), the developmental stage ( $p=0.006$ ), the interaction between cultivar  
265 and water treatment ( $p=0.023$ ) and the interaction among the developmental stage, the  
266 water treatment and the cultivar ( $p=0.001$ ). Generally, higher assimilation rates were  
267 observed under WW treatment than in WD. Besides, higher assimilation rates were found  
268 at the vegetative stage compared to the seed filling stage, and differences among cultivars  
269 revealed that Titicaca and F16 plants were the ones presenting higher CO<sub>2</sub> assimilation  
270 rates compared to F15 plants. Pair comparisons showed distinct patterns depending on  
271 the developmental stage. Thus, in F15 plants, CO<sub>2</sub> assimilation rates were lower at the  
272 vegetative stage under WD conditions, while in WW Titicaca plants, the levels of CO<sub>2</sub>  
273 assimilation rates were lower at the seed filling stage. Moreover, when comparing water

274 treatments, differences appeared in the cultivar F15 at the vegetative and seed filling  
275 stages, with higher rates under WW conditions (Fig. 5C and 5D), Titicaca at the  
276 vegetative stage, with larger rates found under WW conditions (Fig. 5C), and F14 at the  
277 seed filling stage, with larger rates found under WW conditions (Fig. 5D).

278 Water use efficiency (WUE) was calculated considering the photosynthetic rates (A) and  
279 the stomatal conductance ( $g_s$ ), as the ratio  $A/g_s$  (Supplementary Fig. 4). WUE of F15 and  
280 Titicaca cultivars did not change with the water treatment at both developmental stages  
281 (vegetative and seed filling stage). On the contrary, F16 and F14 cultivars subjected to  
282 WD showed higher levels of WUE than the WW plants (at both development stages)  
283 (Supplementary Fig. 4).

284 When the levels of WUE were related to the amount of water applied to keep the water  
285 regimes equal on the soil (Supplementary Fig. 1B) it was observed that the cultivars F15  
286 and Titicaca were the ones presenting larger water consumption rates during  
287 development, contrary to the response observed in F14 and F16 plants. Particularly F15,  
288 despite being the cultivar receiving larger amounts of water, the soil water content (SWC)  
289 of F15 pots remained lower compared to the SWC of the rest of cultivars (Supplementary  
290 Fig. 1A).

291 Chlorophyll fluorescence measurements were taken to evaluate the status of the  
292 photosynthetic membrane (Kalaji et al., 2016) (Fig. 6). Among the parameters evaluated,  
293 the efficiency of the photosystem II ( $\Phi_{PSII}$ ) remained constant throughout the  
294 experiment, with a small decrease observed in the 14<sup>th</sup> week and a sharp decrease at seed  
295 maturation (24<sup>th</sup> week) (Fig. 6A). No differences were observed in  $\Phi_{PSII}$  between water  
296 treatments ( $p=0.430$ ) (WW and WD) nor cultivars ( $p=0.199$ ). Nonetheless, this  
297 parameter was influenced by the developmental stage ( $p<0.001$ ), the interaction between  
298 the developmental stage and the water treatment ( $p=0.002$ ), the developmental stage, and

299 the cultivar ( $p < 0.001$ ), and by the interaction between the water treatment and the cultivar  
300 ( $p = 0.002$ ). Besides, differences appeared when evaluating changes of this parameter  
301 linked to the developmental stage, being F16 the only cultivar that did not show  
302 significant differences throughout development. Also, when comparing by water  
303 treatments, F16 and F14 cultivars showed higher values of  $\Phi PSII$  at WD than at WW at  
304 the inflorescence stage, prior to flowering (11<sup>th</sup> and 14<sup>th</sup> week respectively). At later  
305 stages, WW Titicaca and F16 cultivars presented higher levels of  $\Phi PSII$  than under WD  
306 conditions.

307 Another chlorophyll fluorescence associated parameter, the electron transport rate ( $ETR$ ),  
308 was influenced by the developmental stage ( $p < 0.001$ ), the cultivar ( $p < 0.001$ ), the  
309 interaction between the developmental stage and the cultivar ( $p < 0.001$ ), and by the  
310 interaction among the developmental stage, the cultivar, and the water treatment  
311 ( $p < 0.001$ ) (Fig. 6B).  $ETR$  did not show differences between water treatments but did show  
312 differences depending on the cultivar. In line with this, F16 showed higher  $ETR$  values  
313 compared to the other cultivars. In general, differences associated with the developmental  
314 stage were observed, with an increase at the 14<sup>th</sup> and 18<sup>th</sup> weeks and a later decrease at  
315 the 24<sup>th</sup> week, reaching again 11<sup>th</sup> week  $ETR$  values. When comparing  $ETR$  values in each  
316 developmental stage, this parameter showed specific differences. For example, F15 and  
317 Titicaca WD plants presented lower levels at weeks 14 and 18, while F16 WD plants kept  
318  $ETR$  levels constant during development. The pair comparison between WW and WD  
319 plants revealed developmental-dependent differences. Thus, at pre-anthesis, no  
320 differences were found between WW and WD in F16 ( $p = 0.863$ ) and Titicaca ( $p = 0.436$ )  
321 cultivars, but higher  $ETR$  values were found at WW for the cultivars F14 ( $p = 0.011$ ) and  
322 F15 ( $p = 0.001$ ). On the contrary, at the seed mature stage, no differences were found  
323 between treatments (Fig. 6B).

324 The non-photochemical quenching (*NPQ*) did not reveal a significant influence of the  
325 factors analysed ( $p=0.060$ ) (Fig. 6C). In general terms, *NPQ* remained constant during  
326 the experiment although it showed a small decrease at the 18<sup>th</sup> week in all cultivars and  
327 for both water treatments. No differences were observed between WW and WD or among  
328 cultivars, although the pair comparison showed particular differences, such as the higher  
329 *NPQ* at WD in F14 compared to F14 WW plants (at pre-anthesis) or the higher *NPQ*  
330 values showed by F16 WD compared to WW at seed mature stage (Fig 6C).

331 The maximum quantum yield of PSII (*Fv/Fm*) was also quantified (Fig. 6D). A 3-Way  
332 ANOVA test showed an influence of the water treatment ( $p<0.001$ ) and the  
333 developmental stage ( $p<0.001$ ), including the interactions between these factors and the  
334 cultivar ( $p<0.001$  for all the interactions except for the interaction between the cultivar  
335 and the water treatment which was  $p=0.011$ ). Differences appeared in *Fv/Fm* levels  
336 between water treatments, with higher values under WW compared to WD. No  
337 differences appeared among cultivars. Considering the developmental stage, a reduction  
338 of *Fv/Fm* along the phenological development was observed. Analysing the differences  
339 between water treatments and among cultivars over time, it was observed that *Fv/Fm*  
340 decreased over time starting at the 14<sup>th</sup> week under WW and the 11<sup>th</sup> week under WD.  
341 When comparing by water treatment in each cultivar, all the *Fv/Fm* values were similar  
342 except for the cultivar F14, in which both water treatments showed a small increase in  
343 *Fv/Fm* at the 14<sup>th</sup> week. Furthermore, pairwise comparisons during development were  
344 performed. In moments prior to anthesis, differences between WW and WD treatments  
345 were observed for the cultivar F14 ( $p=0.044$ ). In WW F14, *Fv/Fm* values were higher  
346 than in WD plants. At the final stages of seed maturation, no differences were observed  
347 between water treatments in the F14 cultivar ( $p=0.656$ ), but higher levels of *Fv/Fm* were

348 observed in WW plants compared to WD plants in F15, F16, and Titicaca cultivars  
349 ( $p=0.006$ ,  $p=0.005$ , and  $p=0.001$ , respectively) (Fig. 6D).

350

### 351 *3.3 Seed Yield and Harvest Index (HI)*

352 Seed yield was determined per cultivar and treatment. All WW plants showed higher seed  
353 yields than WD plants (F14 +27,8%, F15 +43,2%, and Titicaca +43%, on average) except  
354 for F16, which did not show differences between treatments (Fig. 7A). No differences in  
355 seed yield were found among cultivars when growing under WD. Under WW conditions  
356 the only difference among cultivars appeared between Titicaca and F16 plants, with  
357 Titicaca presenting higher yields than F16 cultivar.

358 Significant differences in the HI only occurred in the cultivar F16, in which WW F16  
359 plants showed lower HI values than F16 WD (Fig. 7B). At harvesting, the only cultivar  
360 that did not show biomass penalties due to WD was F16 (Supplementary Fig. 5). The rest  
361 of the cultivars reduced their plant biomass under water stress by decreasing the leaf,  
362 stem, and/or seed biomass.

363

## 364 **4. Discussion**

365 Plants trigger different mechanisms to overcome abiotic stress depending on the species.  
366 Quinoa is well known for being an abiotic stress-tolerant crop, including drought  
367 (Jacobsen et al., 2003). Gómez-Pando et al. (Gómez-Pando et al., 2019) attributed  
368 quinoa's drought tolerance to three main mechanisms: drought escape, which is related  
369 to the shortening of the life cycle (Jacobsen et al., 2003); drought avoidance, which can  
370 be achieved by optimising water absorption and water loss through a vigorous root  
371 system, defoliation, and stomatal regulation (Jensen et al., 2000); and drought

372 physiological tolerance, acquired through tissue elasticity and osmolyte regulation  
373 (Bascañán-Godoy et al., 2016; Cutler et al., 1977). Nonetheless, a decrease in  
374 photoprotection mechanisms has been described in this plant when subjected to water  
375 stress (Bosque Sanchez et al., 2006).

376 Regarding drought escape strategies, a reduction of yield associated with water deficits  
377 has been reported in many different staple crops, such as wheat, maize, or rice (Daryanto  
378 et al., 2016; Kumar et al., 2014). This has been linked to a lifespan shortening  
379 consequence of the changes in the plant phenology. For instance, in maize, it was shown  
380 that water stress resulted in the shortening of the vegetative stage accelerating,  
381 consequently, flowering and reducing the grain-filling period, which ended in a grain  
382 yield decrease (Samarah, 2005; Shavrukov et al., 2017). Drought stress applied during  
383 flowering or the grain-filling period can also shorten the reproductive stage of barley and  
384 rice causing grain yield penalties (Kadam et al., 2018; Pantuwan et al., 2002; Samarah,  
385 2005). In line with this, a negative effect of WD on seed yield in quinoa has been  
386 previously reported (Geerts et al., 2008). Geerts et al. (Geerts et al., 2008) applied severe  
387 WD at different developmental stages revealing that the milky seed stage (during seed  
388 filling) was the most sensitive phase to drought followed by flowering. Besides, it was  
389 observed that drought may cause the shortening of quinoa life cycle in the field (Jacobsen  
390 et al., 2003). However, to date, there are very few studies performed in quinoa analysing  
391 the specific physiological and phenological responses to drought, particularly under long-  
392 term water stress, depicting the genotypic control in this respect. In this regard, our study  
393 confirms the genotype-dependency associated with WD response in this crop. For  
394 instance, the phenology of genotype F14 showed an opposing response to F15, F16, or  
395 Titicaca cultivars, increasing its lifespan under WD compared to WW conditions (Fig.1),



396 which highlights the importance of the genetic factor as determinant of the water-stress  
397 response in quinoa.

398 In the current study, the genotype that generally showed higher WD tolerance  
399 (considering drought avoidance strategies like a lower water consumption, the  
400 maintenance of CO<sub>2</sub> assimilation rates, and the stability of the photosynthetic membrane  
401 together with lesser seed yield penalties) was F16. Furthermore, in other crops such as  
402 wheat or lettuce, small decreases in water availability can result in higher photosynthetic  
403 rates maintaining yields due to the improvement in WUE under drought as observed in  
404 some quinoa cultivars in this study (Molina-Montenegro et al., 2011; Van Den Boogaard  
405 et al., 1997) (Supplementary Fig. 4). Higher WUE can be achieved by reducing the  
406 stomatal conductance, while maintaining the photosynthetic capacity (Jacobsen et al.,  
407 2009). An increase in WUE under WD conditions has also been described in quinoa, and  
408 it was related to the stomata closure that resulted in the maintenance of leaf water  
409 potential, keeping active photosynthesis (Geerts et al., 2008). In here, a similar response  
410 was observed in some cultivars (Supplementary Fig. 4). In fact, the F16 cultivar was able  
411 to increase WUE under WD, reducing the stomatal conductance (in comparison with WW  
412 conditions) and keeping CO<sub>2</sub> assimilation rates close to WW conditions, ultimately  
413 maintaining seed yield and increasing HI under water-limiting conditions (Figs. 5 and  
414 7B). The enhanced WUE and tolerance to WD of this genotype were also associated with  
415 leaf area reduction under drought, also observed in F15 (Supplementary Fig. 2). This  
416 strategy has been developed by other important crops such as wheat under WD  
417 (Barraclough et al., 1989).

418 Another trait that could have contributed to enhancing water-stress tolerance by reducing  
419 transpiration in the cultivar F16 was its defoliation rate, which was higher when compared  
420 to the rest of the cultivars and was more pronounced at the final stages of development

421 (Fig. 4B). Higher defoliation rates in this cultivar were observed in the lower parts of the  
422 plant leading to a concentration of leaves (source tissue) in the upper part of the plant,  
423 that were also horizontally disposed around the inflorescence (sink tissue), as it can be  
424 observed in Fig. 4, while the other cultivars did not show such response. Furthermore, the  
425 chlorophyll gradient was much more marked in F16 which could reflect a senescence  
426 induction in lower leaves prior to defoliation (Supplementary Fig. 3). Besides, plant  
427 height was another growth-related trait evaluated in this study, decreasing under stress in  
428 all the genotypes analysed (Fig. 2). An inhibitory effect that has been also observed in  
429 other crop species (Çakir, 2004), and, in the case of F16, was less pronounced and was  
430 related to a higher HI while not being related to seed yield penalties (Fig.7).

431 The plant architecture was very variable among genotypes, and this can impact water  
432 tolerance (Tognetti et al., 2010). Following the quinoa growth habits defined by Rojas  
433 and Pinto (Rojas & Pinto, 2013), the cultivar F16 would fit within the growth habit 1, in  
434 which the number of branches is reduced, F14 could be classified between habits 1 and  
435 2, F15 between habit 2 and 3, and Titicaca within the habit 4, these last presenting larger  
436 ramification number, leaves, and therefore, being more susceptible to water loss due to  
437 higher total leaf surface. This highlights a possible association in quinoa between water-  
438 stress tolerance and the growth habit.

439 Considering all the parameters evaluated in this study, a schematic summary is presented  
440 in Fig. 8 in which a distinction can be made between tolerant and sensitive genotypes in  
441 quinoa based on the water use, different morphological and photosynthetic-related  
442 parameters, and agronomical traits. Thus, a water stress tolerant genotype would increase  
443 WUE under stress conditions, reducing water consumption by lowering its leaf area,  
444 increasing its defoliation rates and chlorophyll index, and concentrating the leaves in the  
445 upper part of the plant closer to the sink tissue (inflorescence). In line with this, a genotype

446 fitting in the growth habit 1 described by Rojas and Pinto (Rojas & Pinto, 2013) would  
447 show an innate advantage facing WD, since a plant architecture presenting fewer and  
448 smaller branches would allow for lower leaf total surface. Besides, in the tolerant  
449 genotypes, a reduced GSW would avoid water loss, without showing a large inhibition of  
450 photosynthesis, thus maintaining seed yield parallel to a HI increment. Accordingly,  
451 considering all these aspects, we could say that quinoa has the potential to present  
452 drought-mediating mechanisms which are genotype-dependent (Jacobsen, 2003;  
453 Jacobsen et al., 2003, 2009, 2013).

454 Environmental degradation of arid regions is often associated with the loss of vegetation  
455 cover, soil, and water resources, which could also result from agricultural practices  
456 (Clarke & Noin, 1998). In this sense, to minimize these impacts, agriculture could bet on  
457 high-yielding resilient nutritious crops such as quinoa (Jaikishun et al., 2019).  
458 Furthermore, within the current global environmental context, linked to limited water  
459 availability in some extensive agricultural areas, finding cultivars that require less water  
460 while keeping productivity is mandatory. In this regard, our study reveals that certain  
461 cultivars, like F16, possess characteristics here proposed as promising for rain-fed areas  
462 (Fig. 8) since, despite not being the most productive genotype under WW conditions  
463 (compared with the other cultivars analysed), it was the cultivar requiring less amount of  
464 water (Supplementary Fig. 1), preserving better this limited resource while maintaining  
465 its yield. On the contrary, the F15 cultivar, which presented similar yields under WW  
466 conditions than WW F16, suffered severe seed yield penalties under WD (Fig.5), and,  
467 presented larger water consumption rates (Supplementary Fig. 1B), thus aligning closer  
468 to the sensitive model phenotype (Fig. 8). Interestingly, some authors have argued that a  
469 bred crop developed with improved WUE, cannot attain high yield potential, similarly to  
470 what was observed in the present study (Blum, 2005) (Fig. 7A). The rationale here is

471 based on the premise that if breeding retains characteristics associated with yield potential  
472 increments (i.e. larger leaf areas) when drought stress occurs, the same traits selected to  
473 improve productivity are detrimental for water preservation. In line with this, it might be  
474 a matter of reaching a balance between productivity and water requirement, which should  
475 be a preferred criterion when selecting quinoa varieties for each agronomical context,  
476 especially those destined to rain-fed conditions. Nonetheless, it should not be forgotten  
477 that, in the field, several biotic and abiotic factors may act simultaneously inducing stress  
478 (Ben Rejeb et al., 2014; Ramegowda & Senthil-Kumar, 2015; Reguera et al., 2012).  
479 Therefore, even though F16 would be an optimal cultivar for rain-fed conditions  
480 according to our findings, its longer life cycle could negatively impact its performance in  
481 Mediterranean climates if flowering or seed filling stages occurred later in the season,  
482 coinciding with high temperatures (Matías et al., 2021).

483 Overall, we can conclude that the cultivars here evaluated presented different mechanisms  
484 to cope with long-term water stress, including changes in phenology, morphology, or in  
485 their physiological response. All these genotype-dependent responses to WD conditions  
486 resulted in yield penalties in most of the cultivars tested except for F16 (Fig. 7A), which  
487 might be the most promising genotype to grow under water-limiting conditions. Thus,  
488 considering the current climate prospects in which certain agricultural areas will suffer  
489 more frequent drought episodes (European Commission, 2019; FAO, 2016, 2022)  
490 together with the need of re-valuing rain-fed agriculture, particularly important in the  
491 Mediterranean area (Araus, 2004; Jacobsen et al., 2013) the selection of more WUE  
492 quinoa cultivars is crucial. In line with this, it is required that we better comprehend the  
493 plant physiological responses associated to water stress using experimental designs able  
494 to mimic field conditions, to ensure the reproducibility of the results. The application of  
495 long-term water stress when analysing plant physiological responses might be tedious but

496 the experimental conditions are closer to what we can find in nature. Altogether, we  
497 believe that this work will significantly contribute to broadening our understanding  
498 regarding how quinoa responds to long-term water stress highlighting genotype-related  
499 differences that will allow the selection of the best adapted genotypes for water-limiting  
500 environments.

#### 501 **Conflict of Interest**

502 The authors declare that the research was conducted in the absence of any commercial or  
503 financial relationships that could be construed as a potential conflict of interest.

#### 504 **Author Contributions**

505 M.R., J.M., I.M.G., and S.G.R. conceived and planned the experiments. I.M.G., S.G.R.,  
506 M.O., and M.R. carried out the experiments. M.R., I.M.G., S.G.R., J.M., M.O., V.C., and  
507 L.B. contributed to the interpretation of the results. M.R., I.M.G., and S.G.R. took the  
508 lead in writing the manuscript. All authors provided critical feedback and helped shape  
509 the research, analysis, and manuscript.

#### 510 **Data Availability**

511 All data supporting the findings of this study are available within the paper and within its  
512 supplementary materials published online

#### 513 **Funding**

514 The authors gratefully acknowledge the financial support received from the Ministerio de  
515 Ciencia e Innovación (MICINN, Spain) (PID2019-105748RA-I00), the Madrid  
516 Government (Comunidad de Madrid-Spain) under the Multiannual Agreement with  
517 Universidad Autónoma de Madrid in the line of action encouraging youth research  
518 doctors, in the context of the V PRICIT (Regional Programme of Research and

519 Technological Innovation) (SI1/PJI/2019-00124), the FPI UAM Fellowship Programme  
520 2019 (to SG-R), and the Ramón y Cajal Programme 2019 (to MR).

## 521 **Acknowledgments**

522 The authors greatly thank Susana Vilariño (Algosur, Spain) for her support helping to  
523 conceive and plan the experiments and for providing, together with Dr. Sven Jacobsen  
524 (Quinoa Quality, Denmark), the quinoa seeds used in this study. The authors would also  
525 like to specially thank Rosendo López García (CBGP (UPM, INIA-CSIC) for his  
526 technical assistance and help in the greenhouse.

## References

- Araus, J. L. (2004). The problems of sustainable water use in the Mediterranean and research requirements for agriculture. *Annals of Applied Biology*, 144(3), 259–272. <https://doi.org/10.1111/j.1744-7348.2004.tb00342.x>
- Barraclough, P. B., Kuhlmann, H., & Weir, A. H. (1989). The Effects of Prolonged Drought and Nitrogen Fertilizer on Root and Shoot Growth and Water Uptake by Winter Wheat. *Journal of Agronomy and Crop Science*, 163(5), 352–360. <https://doi.org/10.1111/J.1439-037X.1989.TB00778.X>
- Bascuñán-Godoy, L., Reguera, M., Abdel-Tawab, Y. M., & Blumwald, E. (2016). Water deficit stress-induced changes in carbon and nitrogen partitioning in *Chenopodium quinoa* Willd. *Planta*, 243(3), 591–603. <https://doi.org/10.1007/s00425-015-2424-z>
- Ben Rejeb, I., Pastor, V., & Mauch-Mani, B. (2014). Plant Responses to Simultaneous Biotic and Abiotic Stress: Molecular Mechanisms. *Plants (Basel, Switzerland)*, 3(4), 458–475. <https://doi.org/10.3390/PLANTS3040458>
- Bertero, H. D., & Ruiz, R. A. (2008). Determination of seed number in sea level quinoa (*Chenopodium quinoa* Willd.) cultivars. *European Journal of Agronomy*, 28(3), 186–194. <https://doi.org/10.1016/J.EJA.2007.07.002>
- Blum, A. (2005). Drought resistance, water-use efficiency, and yield potential - Are they compatible, dissonant, or mutually exclusive? *Australian Journal of Agricultural Research*, 56(11), 1159–1168. <https://doi.org/10.1071/AR05069>
- Bosque Sanchez, H., Lemeur, R., Van Damme, P., & Jacobsen, S. E. (2006). Ecophysiological Analysis Of Drought And Salinity Stress Of Quinoa (*Chenopodium Quinoawilld.*). [Http://Dx.Doi.Org/10.1081/FRI-120018874](http://Dx.Doi.Org/10.1081/FRI-120018874), 19(1–2), 111–119. <https://doi.org/10.1081/FRI-120018874>
- Çakir, R. (2004). Effect of water stress at different development stages on vegetative and reproductive growth of corn. *Field Crops Research*, 89(1), 1–16. <https://doi.org/10.1016/J.FCR.2004.01.005>
- Choukr-Allah, R., Rao, N. K., Hirich, A., Shahid, M., Alshankiti, A., Toderich, K., Gill, S., & Butt, K. U. R. (2016). Quinoa for marginal environments: Toward future food and nutritional security in MENA and central Asia regions. *Frontiers in Plant Science*, 7(MAR2016), 346. <https://doi.org/10.3389/FPLS.2016.00346/BIBTEX>
- Clarke, J., & Noin, D. (1998). Population and environment in arid regions. In *Population and environment in arid regions*. [https://digitallibrary.un.org/record/252012?ln=zh\\_CN](https://digitallibrary.un.org/record/252012?ln=zh_CN)
- Cutler, J. M., Rains, D. W., & Loomis, R. S. (1977). The Importance of Cell Size in the Water Relations of Plants. *Physiologia Plantarum*, 40(4), 255–260. <https://doi.org/10.1111/j.1399-3054.1977.tb04068.x>
- Daryanto, S., Wang, L., & Jacinthe, P. A. (2016). Global Synthesis of Drought Effects on Maize and Wheat Production. *PLOS ONE*, 11(5), e0156362. <https://doi.org/10.1371/JOURNAL.PONE.0156362>
- European Commission. (2019). *About - Water Scarcity & Droughts - Environment -*

- European Commission. <https://ec.europa.eu/environment/water/quantity/about.htm>
- FAO. (2016). *Characterization of the agricultural drought prone areas on global a global scale at scale.*
- FAO. (2022). Drought in the Horn of Africa – Rapid response and mitigation plan to avert a humanitarian catastrophe. In *Drought in the Horn of Africa – Rapid response and mitigation plan to avert a humanitarian catastrophe.* <https://doi.org/10.4060/cb8280en>
- Gámez, A. L., Soba, D., Zamarreño, Á. M., García-Mina, J. M., Aranjuelo, I., & Morales, F. (2019). Effect of water stress during grain filling on yield, quality and physiological traits of illpa and rainbow quinoa (*Chenopodium quinoa* Willd.) cultivars. *Plants*, 8(6), 1–15. <https://doi.org/10.3390/plants8060173>
- Geerts, S., Raes, D., Garcia, M., Vacher, J., Mamani, R., Mendoza, J., Huanca, R., Morales, B., Miranda, R., Cusicanqui, J., & Taboada, C. (2008). Introducing deficit irrigation to stabilize yields of quinoa (*Chenopodium quinoa* Willd.). *European Journal of Agronomy*, 28(3), 427–436. <https://doi.org/10.1016/j.eja.2007.11.008>
- Gómez-Pando, L. R., & Aguilar-Castellanos, E. (2016). Guía de cultivo de la quinua. In *Organización de las Naciones Unidas para la Alimentación y la Agricultura y Universidad Nacional Agraria La Molina.* <https://www.fao.org/documents/card/es/c/3a12f679-22a1-46a0-a91e-6853ca5bb5dd/>
- Gómez-Pando, L. R., Aguilar-Castellanos, E., & Ibañez-Tremolada, M. (2019). Quinoa (*Chenopodium quinoa* Willd.) breeding. *Advances in Plant Breeding Strategies: Cereals*, 5, 259–316. [https://doi.org/10.1007/978-3-030-23108-8\\_7/FIGURES/3](https://doi.org/10.1007/978-3-030-23108-8_7/FIGURES/3)
- Graf, B. L., Rojas-Silva, P., Rojo, L. E., Delatorre-Herrera, J., Baldeón, M. E., & Raskin, I. (2015). Innovations in Health Value and Functional Food Development of Quinoa (*Chenopodium quinoa* Willd.). *Comprehensive Reviews in Food Science and Food Safety*, 14(4), 431–445. <https://doi.org/10.1111/1541-4337.12135>
- Hinojosa, L., González, J. A., Barrios-Masias, F. H., Fuentes, F., & Murphy, K. M. (2018). Quinoa Abiotic Stress Responses: A Review. *Plants (Basel, Switzerland)*, 7(4). <https://doi.org/10.3390/PLANTS7040106>
- Hinojosa, L., Sanad, M. N. M. E., Jarvis, D. E., Steel, P., Murphy, K., & Smertenko, A. (2019). Impact of heat and drought stress on peroxisome proliferation in quinoa. *The Plant Journal : For Cell and Molecular Biology*, 99(6), 1144–1158. <https://doi.org/10.1111/TPJ.14411>
- Jacobsen, S. E. (2003). The Worldwide Potential for Quinoa (*Chenopodium quinoa* Willd.). *Food Reviews International*, 19(1–2), 167–177. <https://doi.org/10.1081/FRI-120018883>
- Jacobsen, S. E., Jensen, C. R., & Liu, F. (2013). Improving Crop Production in the Arid Mediterranean Climate. *Improving Water and Nutrient-Use Efficiency in Food Production Systems*, 187–209. <https://doi.org/10.1002/9781118517994.ch12>
- Jacobsen, S. E., Liu, F., & Jensen, C. R. (2009). Does root-sourced ABA play a role for regulation of stomata under drought in quinoa (*Chenopodium quinoa* Willd.).



*Scientia Horticulturae*, 122(2), 281–287.

<https://doi.org/10.1016/j.scienta.2009.05.019>

- Jacobsen, S. E., Mujica, Á., & Jensen, C. R. (2003). The resistance of quinoa (*Chenopodium quinoa* Willd.) to adverse abiotic factors. *Food Reviews International*, 19(1–2), 99–109. <https://doi.org/10.1081/FRI-120018872>
- Jaikishun, S., Li, W., Yang, Z., & Song, S. (2019). Quinoa: In Perspective of Global Challenges. *Agronomy 2019*, Vol. 9, Page 176, 9(4), 176. <https://doi.org/10.3390/AGRONOMY9040176>
- Jensen, C. R., Jacobsen, S. E., Andersen, M. N., Núñez, N., Andersen, S. D., Rasmussen, L., & Mogensen, V. O. (2000). Leaf gas exchange water relation characteristics of field quinoa (*Chenopodium quinoa* Willd.) during soil drying. *European Journal of Agronomy*, 13(1), 11–25. [https://doi.org/10.1016/S1161-0301\(00\)00055-1](https://doi.org/10.1016/S1161-0301(00)00055-1)
- Kadam, N. N., Struik, P. C., Rebolledo, M. C., Yin, X., & Jagadish, S. V. K. (2018). Genome-wide association reveals novel genomic loci controlling rice grain yield and its component traits under water-deficit stress during the reproductive stage. *Journal of Experimental Botany*, 69(16), 4017–4032. <https://doi.org/10.1093/JXB/ERY186>
- Kalaji, H. M., Jajoo, A., Oukarroum, A., Brestic, M., Zivcak, M., Samborska, I. A., Cetner, M. D., Łukasik, I., Goltsev, V., & Ladle, R. J. (2016). Chlorophyll a fluorescence as a tool to monitor physiological status of plants under abiotic stress conditions. *Acta Physiologiae Plantarum*, 38(4), 1–11. <https://doi.org/10.1007/S11738-016-2113-Y/FIGURES/2>
- Kumar, A., Dixit, S., Ram, T., Yadaw, R. B., Mishra, K. K., & Mandal, N. P. (2014). Breeding high-yielding drought-tolerant rice: Genetic variations and conventional and molecular approaches. *Journal of Experimental Botany*, 65(21), 6265–6278. <https://doi.org/10.1093/jxb/eru363>
- Matías, J., Rodríguez, M. J., Cruz, V., Calvo, P., & Reguera, M. (2021). Heat stress lowers yields, alters nutrient uptake and changes seed quality in quinoa grown under Mediterranean field conditions. *Journal of Agronomy and Crop Science*, 207(3), 481–491. <https://doi.org/10.1111/JAC.12495>
- Molina-Montenegro, M. A., Zurita-Silva, A., & Oses, R. (2011). Effect of water availability on physiological performance and lettuce crop yield (*Lactuca sativa*). *Ciencia e Investigacion Agraria*, 38(1). <https://doi.org/10.4067/S0718-16202011000100006>
- Moser, S. B. (2004). *Effects of pre-anthesis drought stress and nitrogen on yield, nitrogen use efficiency, and grain minerals of tropical maize varieties* [ETH Zürich]. <https://doi.org/10.3929/ETHZ-A-004931016>
- Naumann, G., Cammalleri, C., Mentaschi, L., & Feyen, L. (2021). Increased economic drought impacts in Europe with anthropogenic warming. *Nature Climate Change* 2021 11:6, 11(6), 485–491. <https://doi.org/10.1038/s41558-021-01044-3>
- Pantuwan, G., Fukai, S., Cooper, M., Rajatasereekul, S., & O’Toole, J. C. (2002). Yield response of rice (*Oryza sativa* L.) genotypes to different types of drought under rainfed lowlands: Part 1. Grain yield and yield components. *Field Crops Research*,

73(2–3), 153–168. [https://doi.org/10.1016/S0378-4290\(01\)00187-3](https://doi.org/10.1016/S0378-4290(01)00187-3)

- Qadir, M., Sharma, B. R., Bruggeman, A., Choukr-Allah, R., & Karajeh, F. (2007). Non-conventional water resources and opportunities for water augmentation to achieve food security in water scarce countries. *Agricultural Water Management*, 87(1), 2–22. <https://doi.org/10.1016/j.agwat.2006.03.018>
- Ramegowda, V., & Senthil-Kumar, M. (2015). The interactive effects of simultaneous biotic and abiotic stresses on plants: Mechanistic understanding from drought and pathogen combination. *Journal of Plant Physiology*, 176, 47–54. <https://doi.org/10.1016/J.JPLPH.2014.11.008>
- Reguera, M., Peleg, Z., & Blumwald, E. (2012). Targeting metabolic pathways for genetic engineering abiotic stress-tolerance in crops. *Biochimica et Biophysica Acta (BBA) - Gene Regulatory Mechanisms*, 1819(2), 186–194. <https://doi.org/10.1016/J.BBAGRM.2011.08.005>
- Rojas, W., & Pinto, M. (2013). La diversidad genética de quinua de Bolivia. In M. Vargas (Ed.), *Congreso Científico de la Quinoa (Memorias)* (pp. 77–91).
- Samarah, N. H. (2005). Effects of drought stress on growth and yield of barley. *Agronomy for Sustainable Development*, 25(1), 145–149. <https://doi.org/10.1051/AGRO:2004064>
- Shavrukov, Y., Kurishbayev, A., Jatayev, S., Shvidchenko, V., Zotova, L., Koekemoer, F., De Groot, S., Soole, K., & Langridge, P. (2017). Early flowering as a drought escape mechanism in plants: How can it aid wheat production? *Frontiers in Plant Science*, 8, 1950. <https://doi.org/10.3389/FPLS.2017.01950/BIBTEX>
- Singh, B. D. (2009). Plant Breeding Principles and Methods. In *Weed Science* (Issue 2). Kalyani. [https://books.google.com/books/about/Plant\\_Breeding.html?hl=es&id=q1omywAACAAJ](https://books.google.com/books/about/Plant_Breeding.html?hl=es&id=q1omywAACAAJ)
- Tognetti, V. B., van Aken, O., Morreel, K., et al. (2010). Perturbation of Indole-3-Butyric Acid Homeostasis by the UDP-Glucosyltransferase UGT74E2 Modulates Arabidopsis Architecture and Water Stress Tolerance. *The Plant Cell*, 22(8), 2660. <https://doi.org/10.1105/TPC.109.071316>
- Tramblay, Y., Koutroulis, A., Samaniego, L., et al. (2020). Challenges for drought assessment in the Mediterranean region under future climate scenarios. *Earth-Science Reviews*, 210, 103348. <https://doi.org/10.1016/J.EARSCIREV.2020.103348>
- Van Den Boogaard, R., Alewijnse, D., Veneklaas, E. J., & Lambers, H. (1997). Growth and water-use efficiency of 10 Triticum aestivum cultivars at different water availability in relation to allocation of biomass. *Plant, Cell and Environment*, 20(2), 200–210. <https://doi.org/10.1046/j.1365-3040.1997.d01-60.x>
- Vega-Gálvez, A., Miranda, M., Vergara, J., Uribe, E., Puente, L., & Martínez, E. A. (2010). Nutrition facts and functional potential of quinoa (Chenopodium quinoa willd.), an ancient Andean grain: a review. *Journal of the Science of Food and Agriculture*, 90(15), 2541–2547. <https://doi.org/10.1002/JSFA.4158>
- Zou, C., Chen, A., Xiao, L., et al. (2017). A high-quality genome assembly of quinoa

provides insights into the molecular basis of salt bladder-based salinity tolerance and the exceptional nutritional value. *Cell Research* 2017 27:11, 27(11), 1327–1340. <https://doi.org/10.1038/cr.2017.124>

## Figure Legends

**Figure 1. Phenological growth stages of *Chenopodium quinoa* (quinoa) cultivars grown under well-watered (WW) or water deficit (WD) conditions.** Different phenological stages were identified in quinoa and the quinoa cultivars (F14, F15, F16, and Titicaca) were characterized according to the different phenological phases depending on the water treatment (WW or WD). To reach a particular phenological phase was considered when 50% or more of the plants achieved a particular developmental stage. Water stress was applied from the 7<sup>th</sup> week onwards as indicated by the vertical arrow in the graph. Each water condition is represented by either continuous (WW) or dashed lines (WD) and each genotype with rhombus (F14), squares (F15), circles (F16), or triangles (Titicaca). Sample size (n) was 25. Scale bars representing the plant size are indicated as vertical lines in the left part of the images (Y axis).

**Figure 2. Plant height throughout development of different quinoa cultivars grown under two water regimes (WW or WD).** (A) Plant height (cm) for each water condition represented by either continuous (WW) or dashed lines (WS) and each genotype with rhombus (F14), squares (F15), circles (F16) or triangles (Titicaca). The statistical analyses performed for this parameter are presented in Supplementary Table 2. (B) Plant height (upper graph) and panicle length (bottom graph) (in cm) at harvesting are presented. Columns that do not share the same letters show statistically significant differences following Kruskal-Wallis test at  $p$ -value  $<0.05$  for both, plant height and panicle length, with  $n \geq 6$ . Error bars represent the standard deviation of the mean value. (C) The ratio between panicle length and plant height at harvesting is represented by double circles in which the external circle (black) shows the plant height under WW and the inner circle shows the plant height under WD (dark grey). Panicle length is presented proportionally to the plant height (in light grey) for each condition.

**Figure 3. Plant biomass at vegetative stage for each quinoa cultivar and water treatment (WW or WD).** Fresh weight (FW) (g) is represented by the wider columns while the dry weight (DW) (g) is represented by the inner columns, in which the stem DW (g) (dark dashed columns) and the leaves DW weight (g) (grey dashed columns) are differentiated, being the total DW of the plant the sum of both. Error bars represent the standard deviation of the mean value ( $n=6$ ). Columns that do not share the same letters show statistically significant differences following Kruskal-Wallis test at  $p$ -value at 0.05 for FW, and One Way ANOVA followed by a Tukey post-hoc test at a  $p$ -value  $<0.05$  for DW.

**Figure 4. Time course images and defoliation rates of different quinoa cultivars grown under different water treatments (WW or WD) throughout development.** (A) Images of the quinoa plants including both water treatments (in the left image WW conditions, or in the right image WD conditions) and the four cultivars analyzed in this study (F14, F15, F16 and Titicaca) together with (B) the defoliation rates by the phenological stage. Letters indicate the week number after seed sowing as follows: a: 10<sup>th</sup> week; b: 11<sup>th</sup> week; c: 14<sup>th</sup> week; d: 18<sup>th</sup> week and e: 24<sup>th</sup> week.

**Figure 5. Photosynthetic-related parameters in quinoa cultivars growing under well-watered (WW) or water stress conditions (WD).** (A) The chlorophyll index, (B) the stomatal conductance (GSW ( $\text{mol/m}^2 \text{ s}^{-1}$ )), (C) the  $\text{CO}_2$  assimilation rates at vegetative state ( $\mu\text{mol/mol}$ ) (Week 13<sup>th</sup>) and (D) the  $\text{CO}_2$  assimilation rates at seed filling state ( $\mu\text{mol/mol}$ ) (Week 17<sup>th</sup>) measured in the upper fully expanded leaves of the plant. The statistical analyses performed for the chlorophyll index and the stomatal conductance data analysis are presented in Supplementary Table 3. Error bars in panels C and D represent the standard deviation of the mean value. Asterisks (\*) indicate statistically significant differences among cultivars subjected to different water treatments (WW or WD), following a pairwise comparison (t-Student when the data followed a normal distribution or U Mann-Whitney when the data did not follow a normal distribution) at a  $p$ -value  $<0.05$ .

**Figure 6. Chlorophyll fluorescence-related parameters measured throughout development in different quinoa cultivars subjected to different water treatments (WW or WD).** The chlorophyll fluorescence-related parameters included: (A) the efficiency of the PSII ( $\Phi\text{PSII}$ ) (B), the electron transport rate (ETR ( $\mu\text{mol} * \text{m}^{-2} \text{ s}^{-1}$ )) (C), the non-photochemical quenching (NPQ) (D), and the maximum efficiency of photosystem II (Fv/Fm) and were all measured throughout development in the different cultivars evaluated under different water regimes. Each water condition is represented by either continuous (WW) or dashed lines (WS) and each genotype with rhombus (F14), squares (F15), circles (F16) or triangles (Titicaca). The statistical analyses performed for these parameters are presented in Supplementary Table 3.

**Figure 7. Total seed yield and harvest index of the quinoa cultivars subjected to both water treatments (WW or WD).** (A) Total Seed Yield (g of seeds/plant) and (B) Harvest Index (%) were determined at the end of the experiment for each cultivar (F14, F15, F16, and Titicaca) subjected to both water treatments (WW, black and grey columns) or WD (dashed black and grey columns). Error bars represent the standard deviation of the mean value. Asterisks (\*) show statistically significant differences among cultivars subjected to different water treatments, following a pairwise comparison (t-Student when the data followed a normal distribution or U Mann-Whitney when the data did not follow a normal distribution) at a  $p$ -value  $<0.05$ .

**Figure 8. Main morphological, physiological and agronomical traits associated to two contrasting phenotypes: water tolerant versus water sensitive quinoa genotypes.** This schematic model highlights the main characteristics associated to a water tolerant or a water sensitive quinoa genotype when facing drought conditions. These characteristics were classified in four main groups: water use, morphological traits, photosynthesis related parameters and agronomical parameters. The model was based on the results presented by the different genotypes analyzed in the current study that reflected a differential response to water stress, being F16 a genotype that would fit in the water tolerant genotype group, and F15 one that would mostly fit in the water sensitive genotype group.

### Supplementary data

Supplementary data are available at JXB online.

Table S1. Leaf number and ramification number of quinoa plants at vegetative stage.

Table S2. Statistical analysis performed for the plant height parameter.

Table S3. Statistical analysis performed for the photosynthetic-related parameters.

Table S4. Statistical analysis performed for chlorophyll fluorescence-related parameters.

Fig. S1. Soil water content and water supply in the quinoa pots used throughout the experiment.

Fig. S2. Leaf area of newly fully expanded leaves of quinoa growing under two water treatments (WW or WD).

Fig. S3. Chlorophyll index gradient of leaves determined at two developmental stages (vegetative stage and at seed filling stage) in different quinoa genotypes growing at two different water conditions (WW and WD).

Fig. S4. Water use efficiency (WUE) of different quinoa cultivars growing under two water regimes (WW or WD).

Fig. S5. Total dry plant biomass at harvesting of different quinoa cultivars growing under two different water treatments (WW or WD).

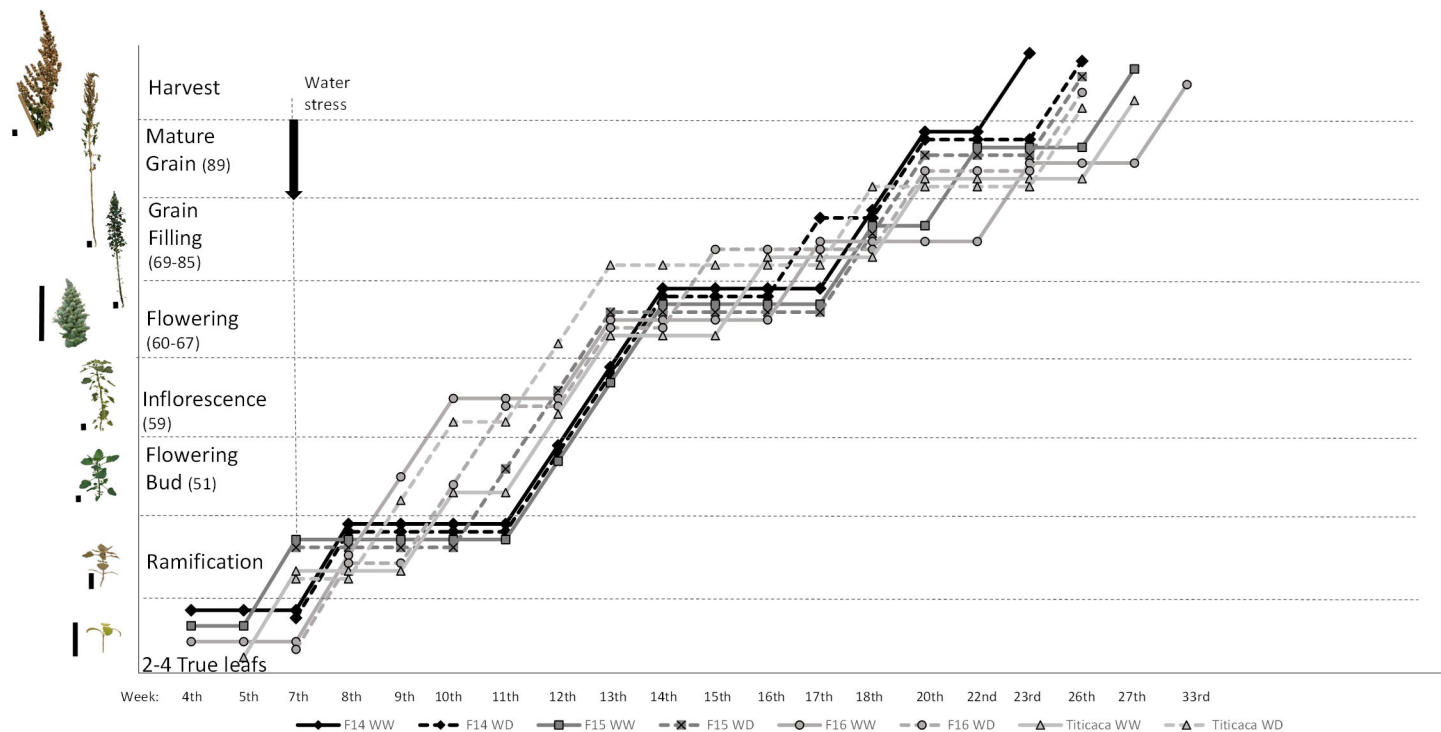

**Figure 1. Phenological growth stages of *Chenopodium quinoa* (quinoa) cultivars grown under well water (WW) or water deficit (WD) conditions.** Different phenological stages were identified in quinoa and the quinoa cultivars (F14, F15, F16, and Titicaca) were characterized according to the different phenological phases depending on the water treatment (WW or WD). To reach a particular phenological phase was considered when 50% or more of the plants achieved a particular developmental stage. Water stress was applied from the 7<sup>th</sup> week onwards as indicated by the vertical arrow in the graph. Each water condition is represented by either continuous (WW) or dashed lines (WD) and each genotype with rhombus (F14), squares (F15), circles (F16), or triangles (Titicaca). Sample size (n) was 25. Scale bars representing the plant size are indicated as vertical lines in the left part of the images (Y axis).

A

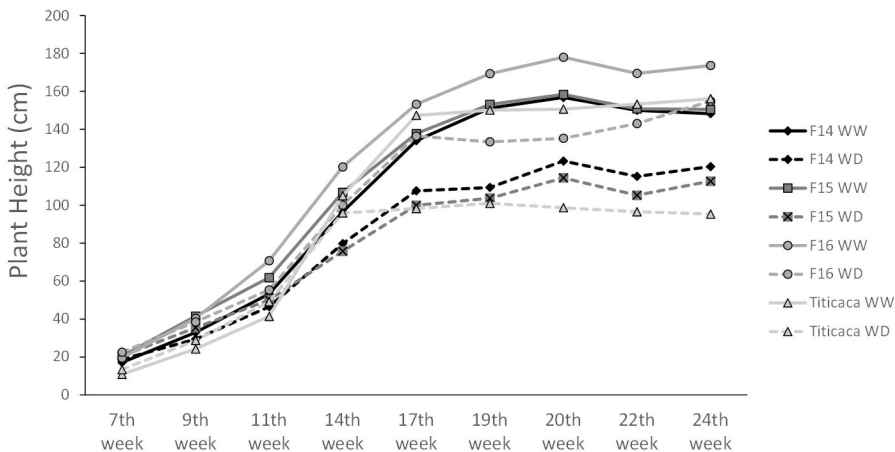

B

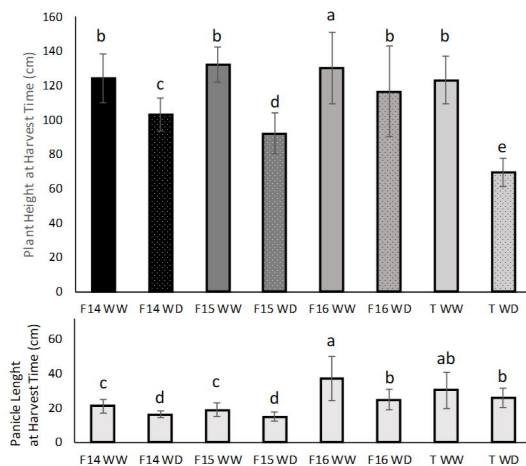

C

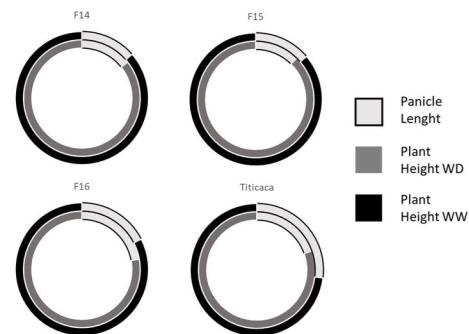

**Figure 2. Plant height throughout development of different quinoa cultivars grown under two water regimes (WW or WD).** (A) Plant height (cm) for each water condition represented by either continuous (WW) or dashed lines (WS) and each genotype with rhombus (F14), squares (F15), circles (F16) or triangles (Titicaca). The statistical analyses performed for this parameter are presented in Supplementary Table 2. (B) Plant height (upper graph) and panicle length (bottom graph) (in cm) at harvesting are presented. Columns that do not share the same letters show statistically significant differences following Kruskal-Wallis test at  $p$ -value  $<0.05$  for both, plant height and panicle length, with  $n \geq 6$ . Error bars represent the standard deviation of the mean value. (C) The ratio between panicle length and plant height at harvesting is represented by double circles in which the external circle (black) shows the plant height under WW and the inner circle shows the plant height under WD (dark grey). Panicle length is presented proportionally to the plant height (in light grey) for each condition.

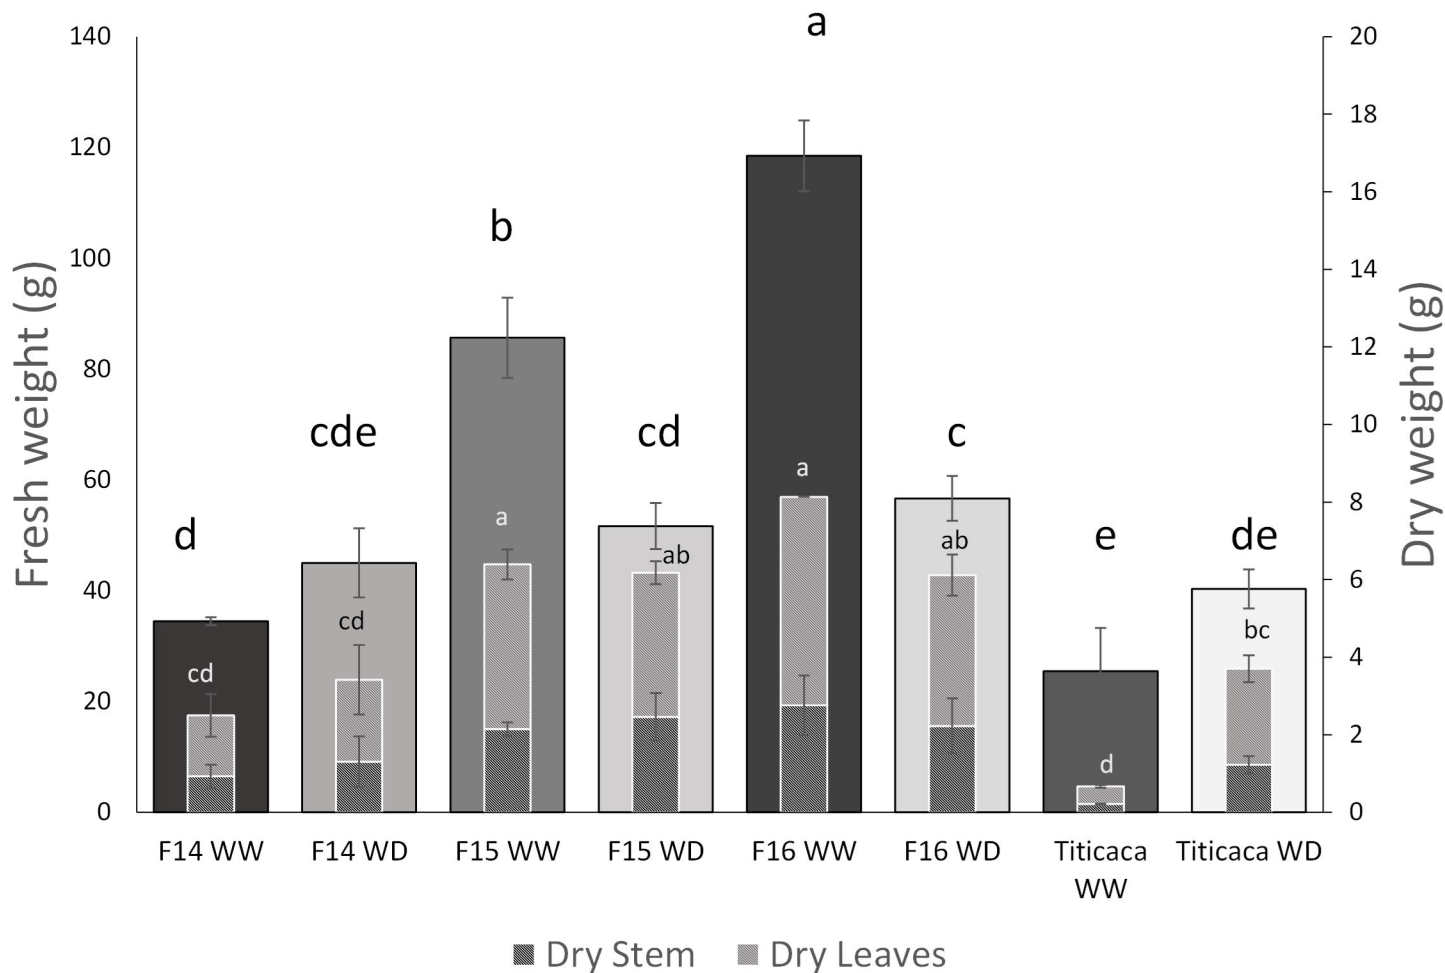

**Figure 3. Plant biomass at vegetative stage for each quinoa cultivar and water treatment (WW or WD).** Fresh weight (FW) (g) is represented by the wider columns while the dry weight (DW) (g) is represented by the inner columns, in which the stem DW (g) (dark dashed columns) and the leaves DW weight (g) (grey dashed columns) are differentiated, being the total DW of the plant the sum of both. Error bars represent the standard deviation of the mean value (n=6). Columns that do not share the same letters show statistically significant differences following Kruskal-Wallis test at  $p$ -value at 0.05 for FW, and One Way ANOVA followed by a Tukey post-hoc test at a  $p$ -value <0.05 for DW.



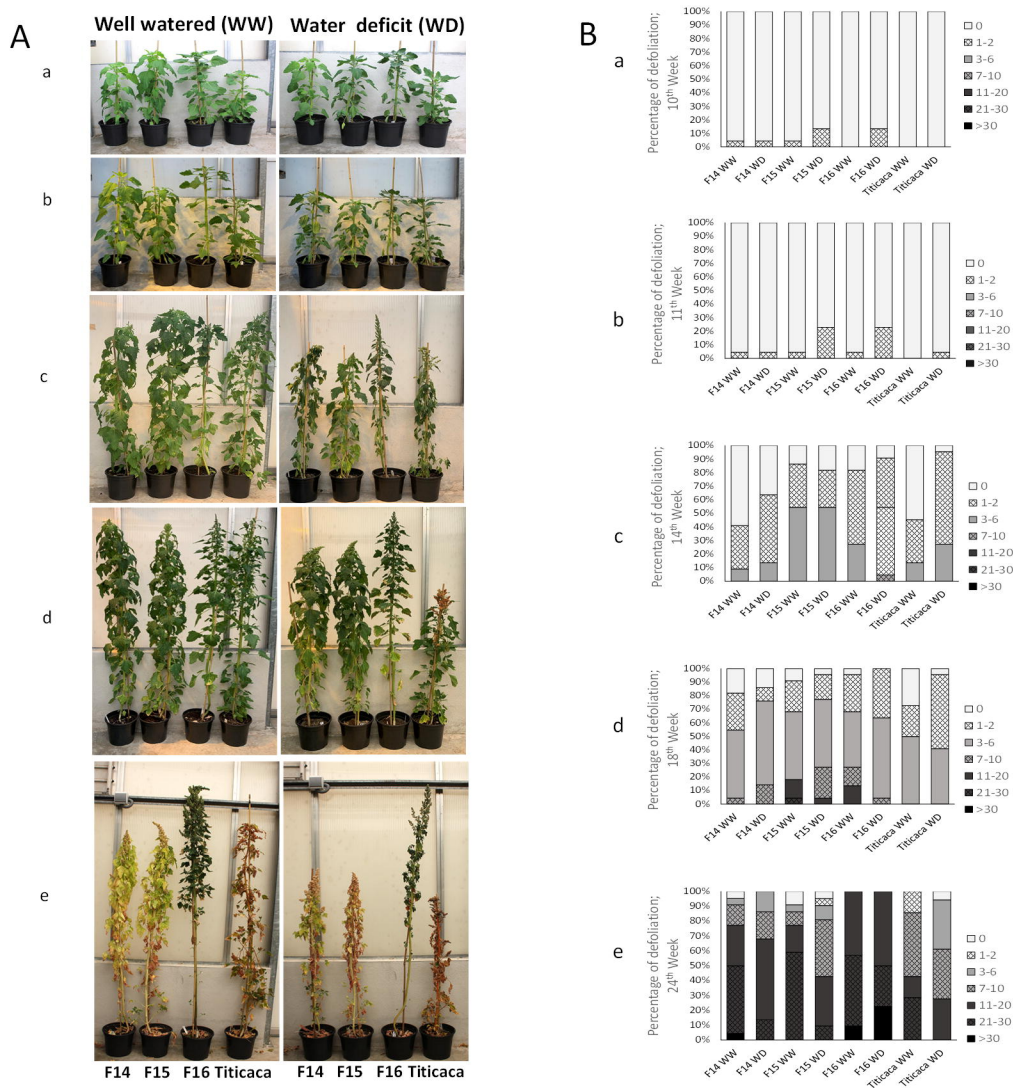

**Figure 4. Time course images and defoliation rates of different quinoa cultivars grown under different water treatments (WW or WD) throughout development. (A)** Images of the quinoa plants including both water treatments (in the left image WW conditions, or in the right image WD conditions) and the four cultivars analyzed in this study (F14, F15, F16 and Titicaca) together with **(B)** the defoliation rates by the phenological stage. Letters indicate the week number after seed sowing as follows: a: 10<sup>th</sup> week; b: 11<sup>th</sup> week; c: 14<sup>th</sup> week; d: 18<sup>th</sup> week and e: 24<sup>th</sup> week.

A

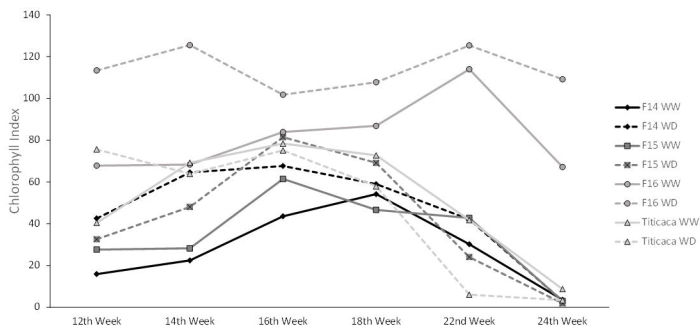

B

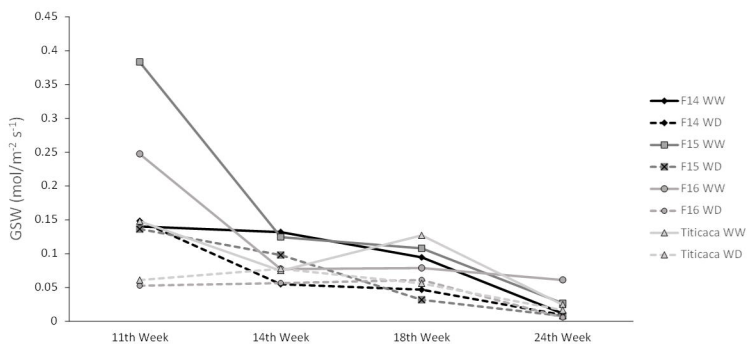

C

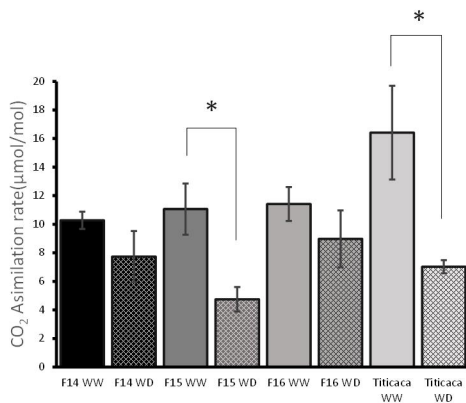

D

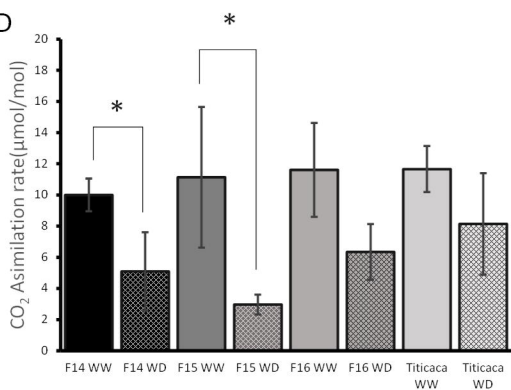

**Figure 5. Photosynthetic-related parameters in quinoa cultivars growing under well water (WW) or water stress conditions (WD).** (A) The chlorophyll index, (B) the stomatal conductance (GSW ( $\text{mol}/\text{m}^2 \text{s}^{-1}$ )), (C) the  $\text{CO}_2$  assimilation rates at vegetative state ( $\mu\text{mol}/\text{mol}$ ) (Week 13<sup>th</sup>) and (D) the  $\text{CO}_2$  assimilation rates at seed filling state ( $\mu\text{mol}/\text{mol}$ ) (Week 17<sup>th</sup>) measured in the upper fully expanded leaves of the plant. The statistical analyses performed for the chlorophyll index and the stomatal conductance data analysis are presented in Supplementary Table 3. Error bars in panels C and D represent the standard deviation of the mean value. Asterisks (\*) indicate statistically significant differences among cultivars subjected to different water treatments (WW or WD), following a pairwise comparison (t-Student when the data followed a normal distribution or U Mann-Whitney when the data did not follow a normal distribution) at a  $p$ -value  $< 0.05$ .

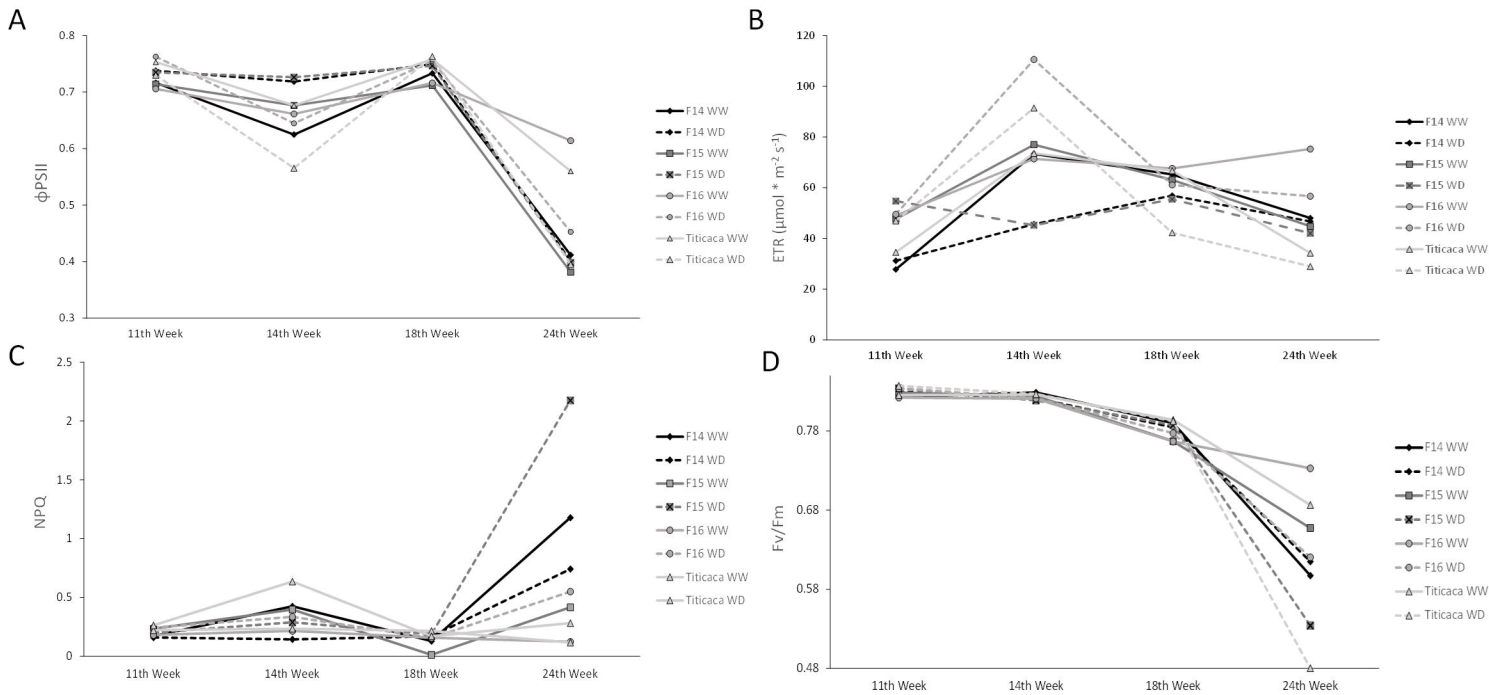

**Figure 6. Chlorophyll fluorescence-related parameters measured throughout development in different quinoa cultivars subjected to different water treatments (WW or WD).** The chlorophyll fluorescence-related parameters included: (A) the efficiency of the PSII ( $\Phi_{PSII}$ ) (B), the electron transport rate (ETR ( $\mu\text{mol} \cdot \text{m}^{-2} \cdot \text{s}^{-1}$ )) (C), the non-photochemical quenching (NPQ) (D), and the maximum efficiency of photosystem II (Fv/Fm) and were all measured throughout development in the different cultivars evaluated under different water regimes. Each water condition is represented by either continuous (WW) or dashed lines (WD) and each genotype with rhombus (F14), squares (F15), circles (F16) or triangles (Titicaca). The statistical analyses performed for these parameters are presented in Supplementary Table 3.

A

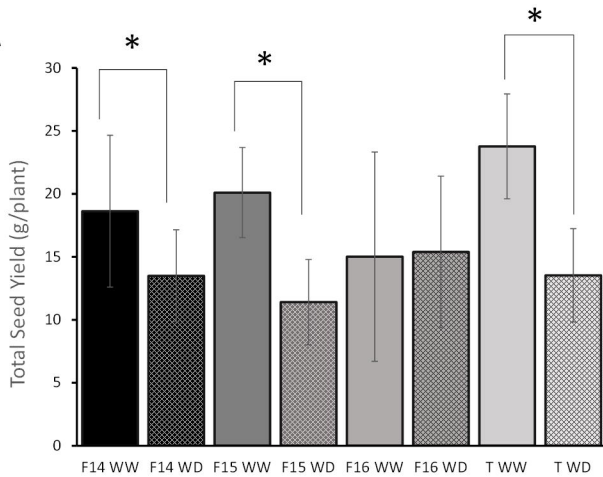

B

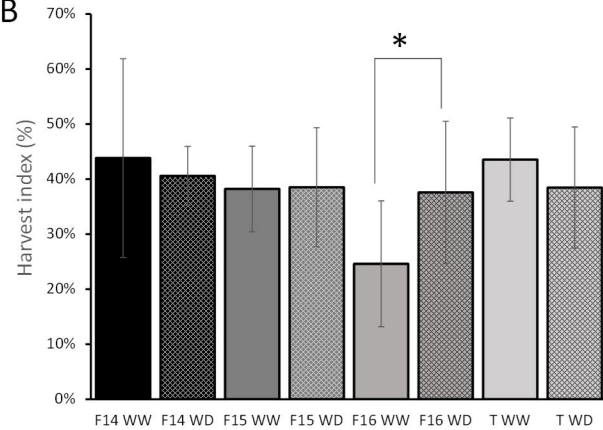

**Figure 7. Total seed yield and harvest index of the quinoa cultivars subjected to both water treatments (WW or WD).** (A) Total Seed Yield (g of seeds/plant) and (B) Harvest Index (%) were determined at the end of the experiment for each cultivar (F14, F15, F16, and Titicaca) subjected to both water treatments (WW, black and grey columns) or WD (dashed black and grey columns). Error bars represent the standard deviation of the mean value. Asterisks (\*) show statistically significant differences among cultivars subjected to different water treatments, following a pairwise comparison (t-Student when the data followed a normal distribution or U Mann-Whitney when the data did not follow a normal distribution) at a  $p$ -value  $<0.05$ .

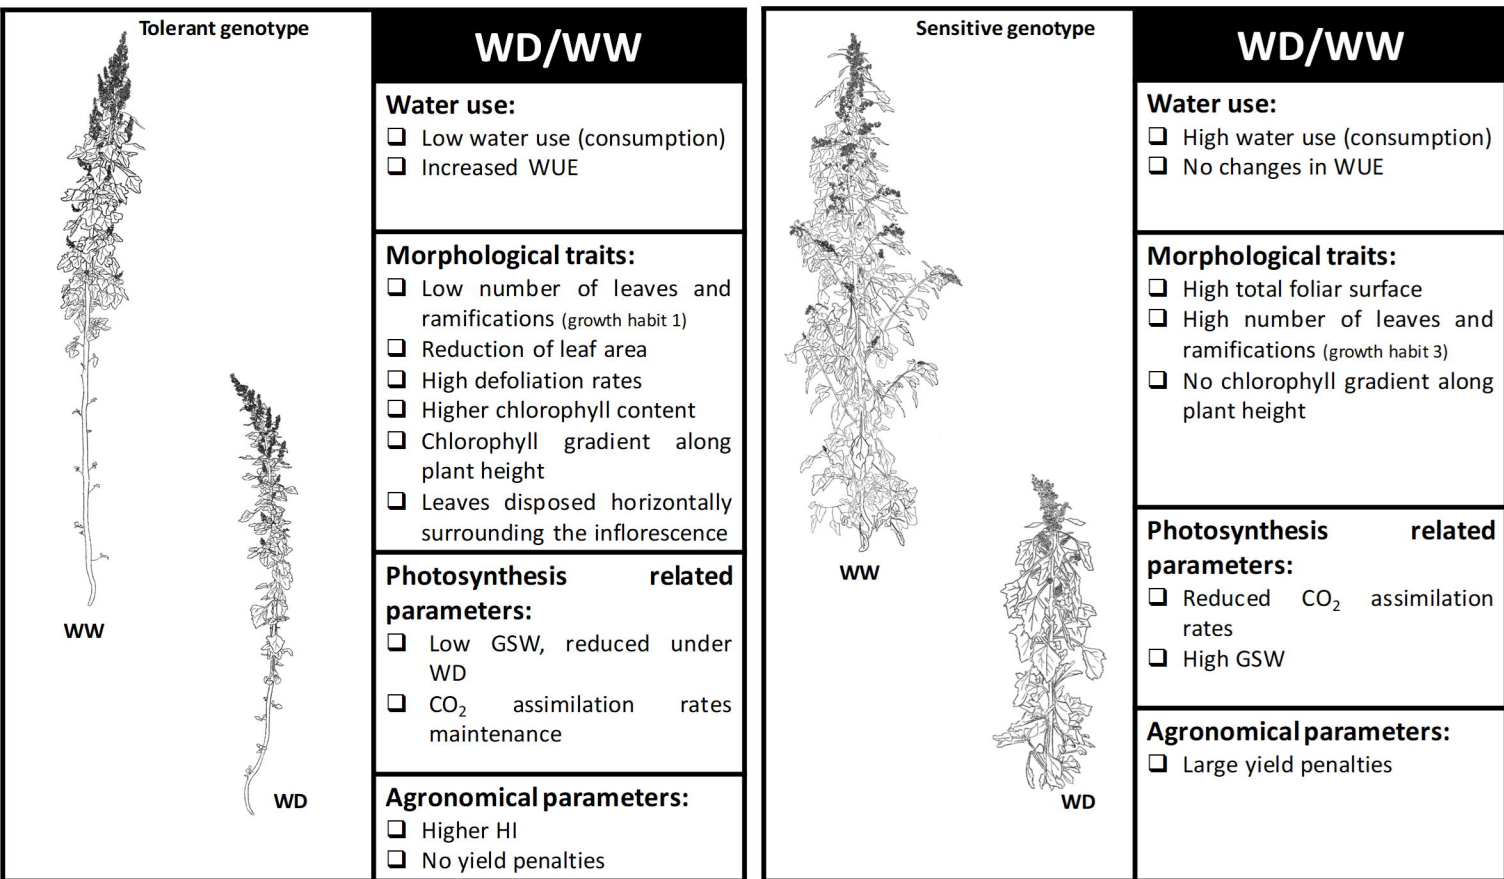

**Figure 8. Main morphological, physiological and agronomical traits associated to two contrasting phenotypes: water tolerant versus water sensitive quinoa genotypes.** This schematic model highlights the main characteristics associated to a water tolerant or a water sensitive quinoa genotype when facing drought conditions. These characteristics were classified in four main groups: water use, morphological traits, photosynthesis related parameters and agronomical parameters. The model was based on the results presented by the different genotypes analyzed in the current study that reflected a differential response to water stress, being F16 a genotype that would fit in the water tolerant genotype group, and F15 one that would mostly fit in the water sensitive genotype group.
